# Supplementary material
Source: PubMed Central journal article supplement (PMC4379047)

**A**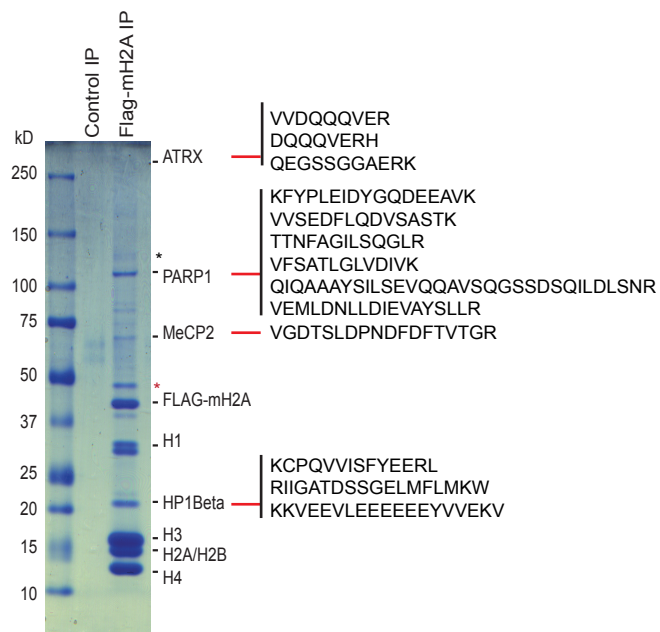**B**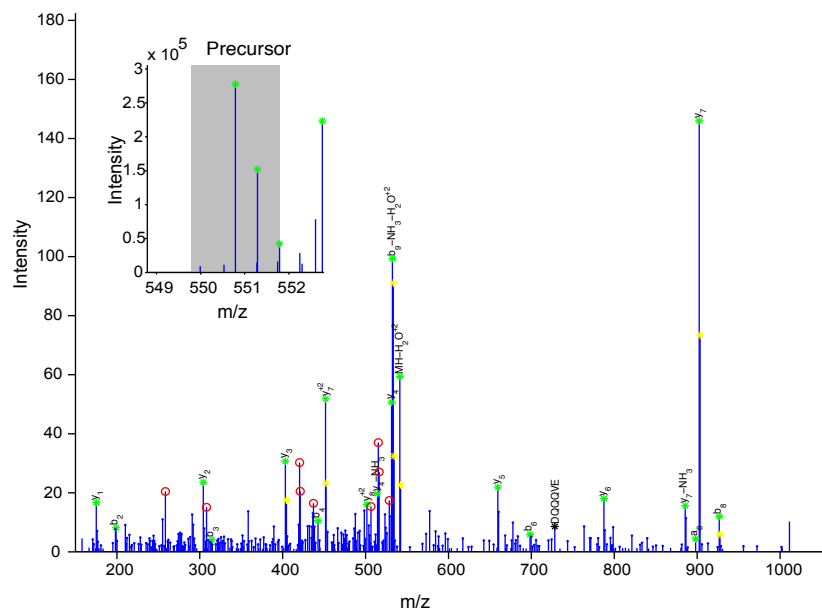**Figure S1**

Supplement: NIHMS635642-supplement-Figure_S1.pdf [file NIHMS635642-supplement-Figure_S1.pdf]

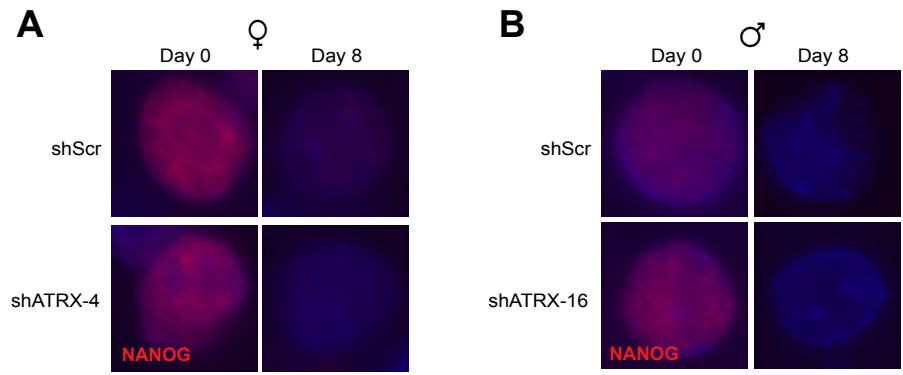

**Figure S2**

Supplement: NIHMS635642-supplement-Figure_S2.pdf [file NIHMS635642-supplement-Figure_S2.pdf]

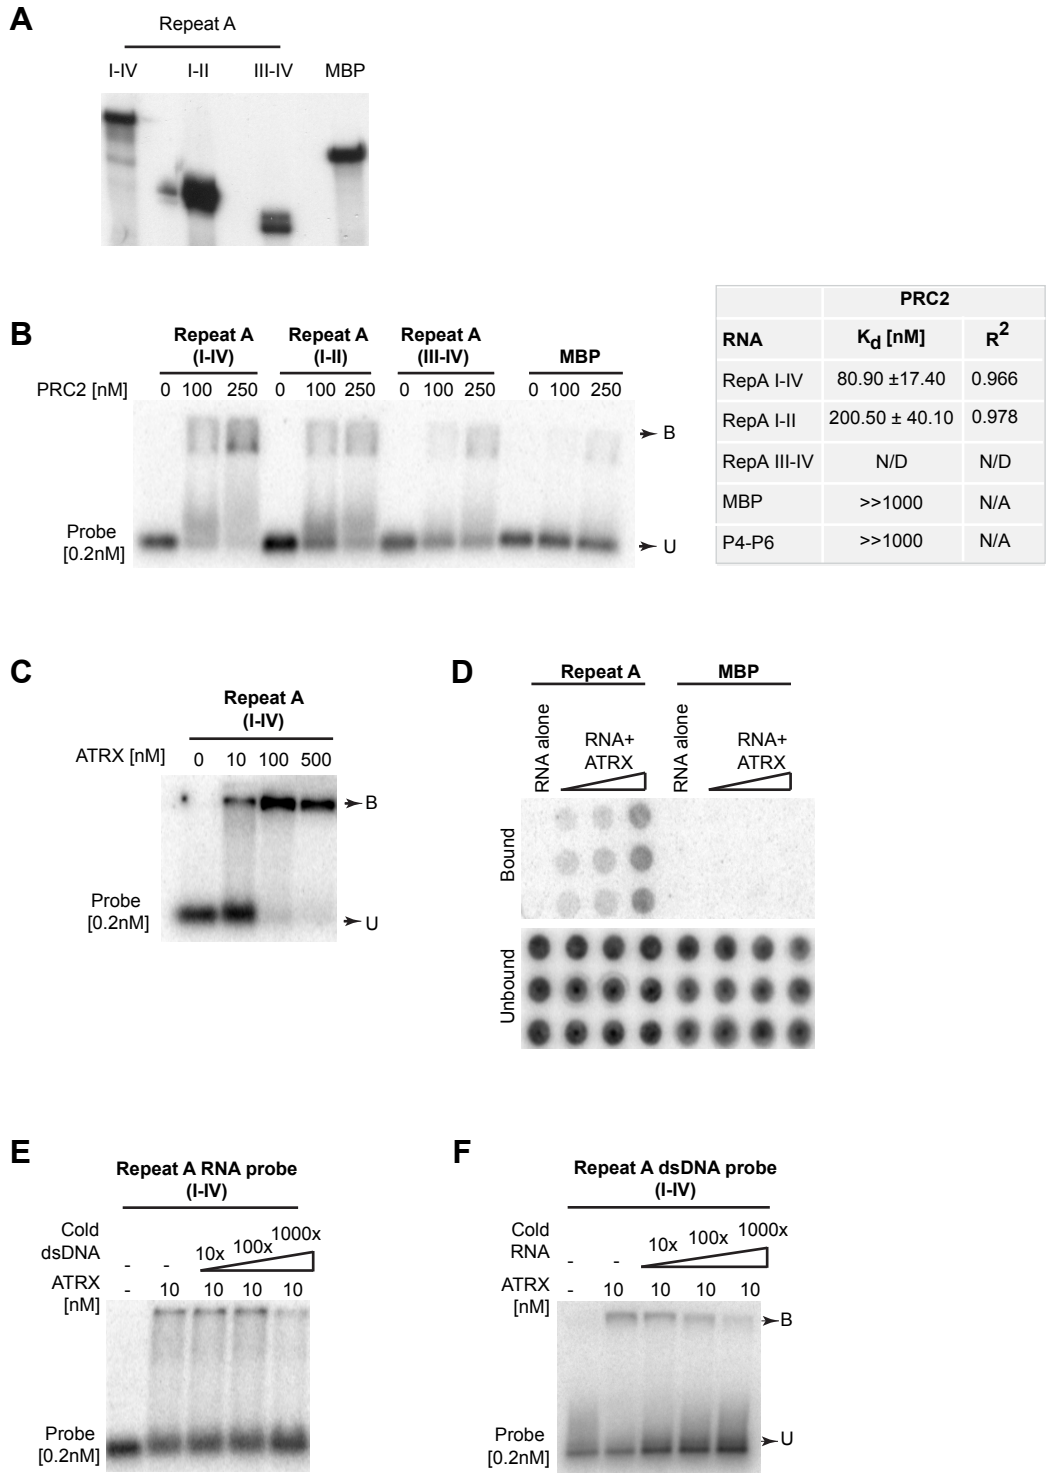

Figure S3

Supplement: NIHMS635642-supplement-Figure_S3.pdf [file NIHMS635642-supplement-Figure_S3.pdf]

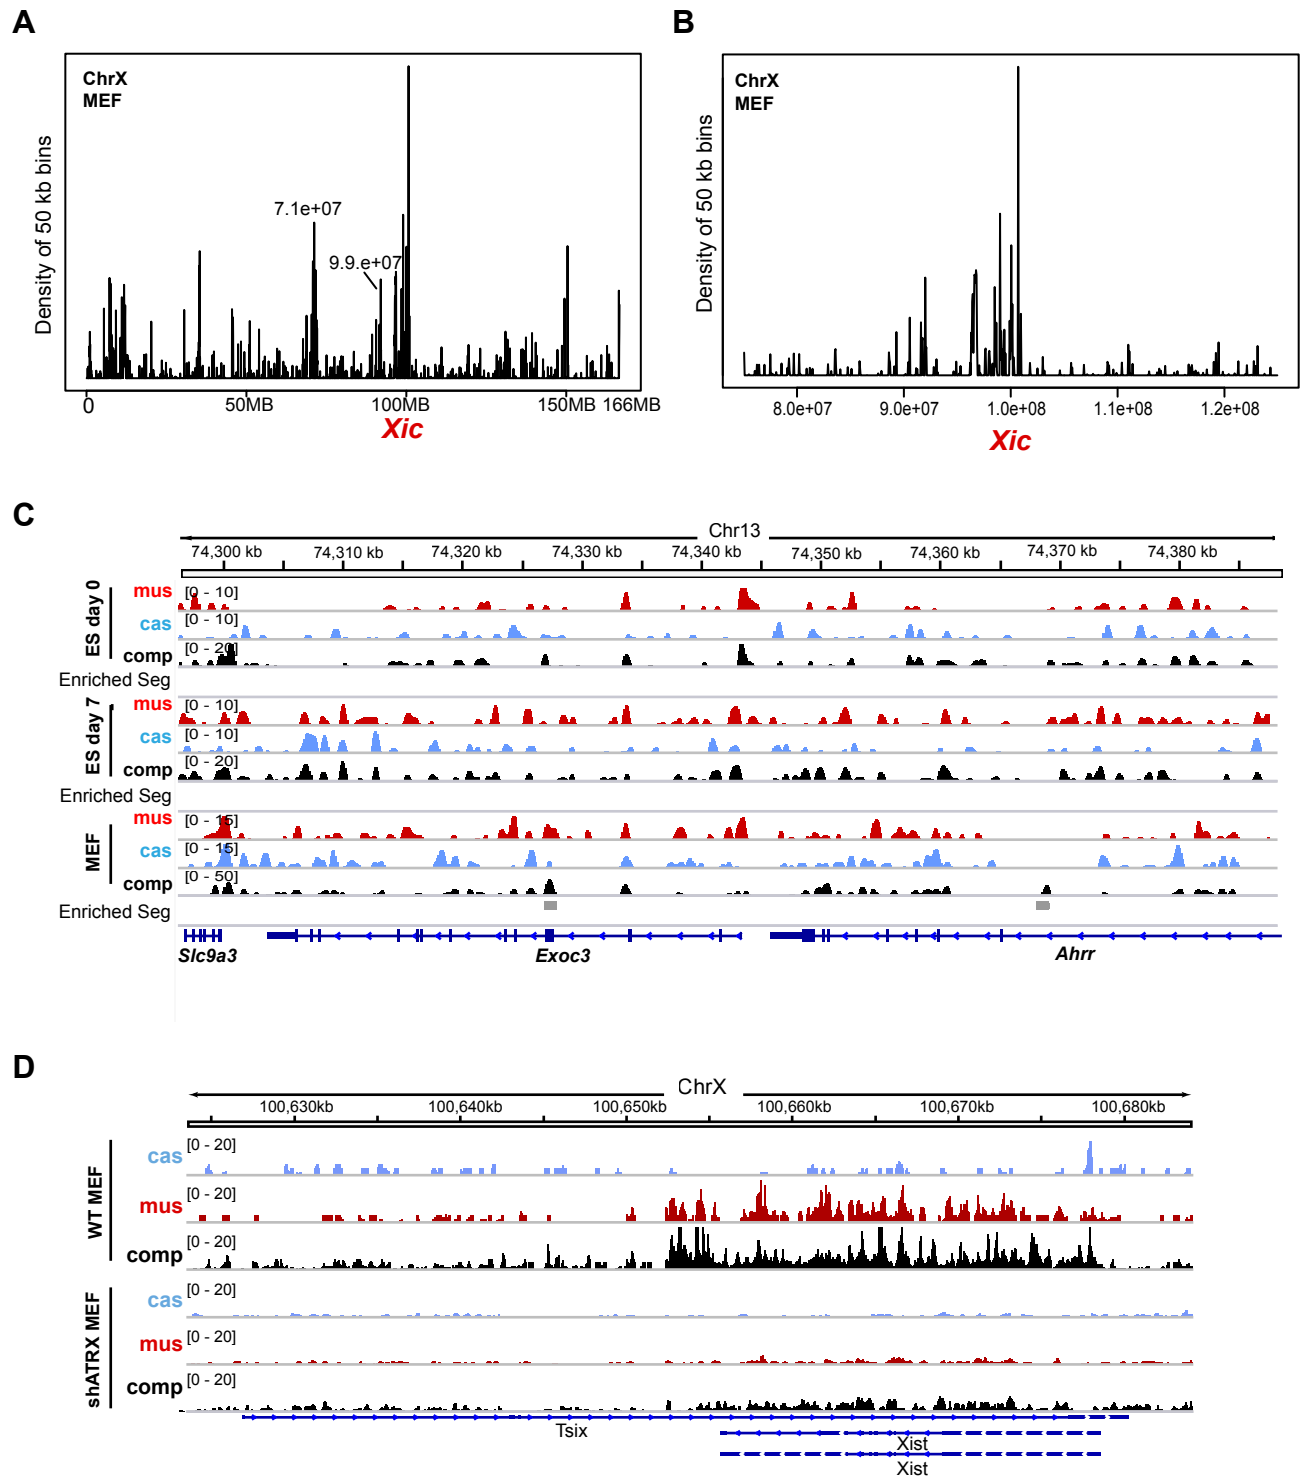

Figure S4

Supplement: NIHMS635642-supplement-Figure_S4.pdf [file NIHMS635642-supplement-Figure_S4.pdf]

**A**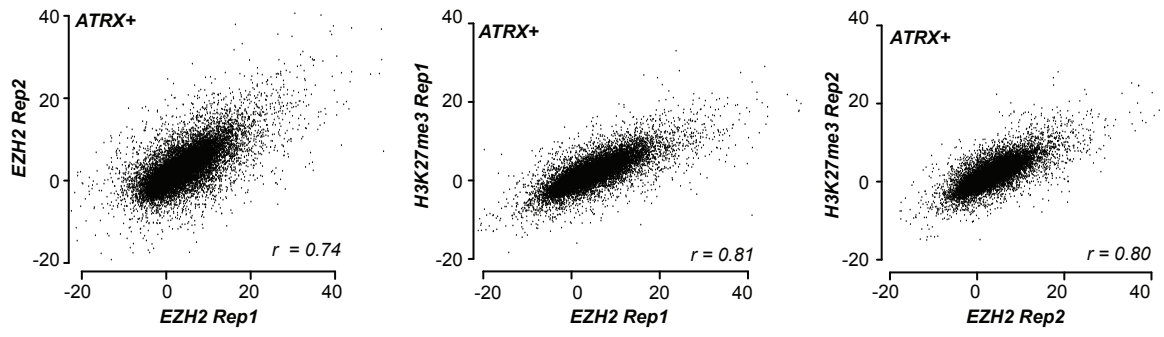**B**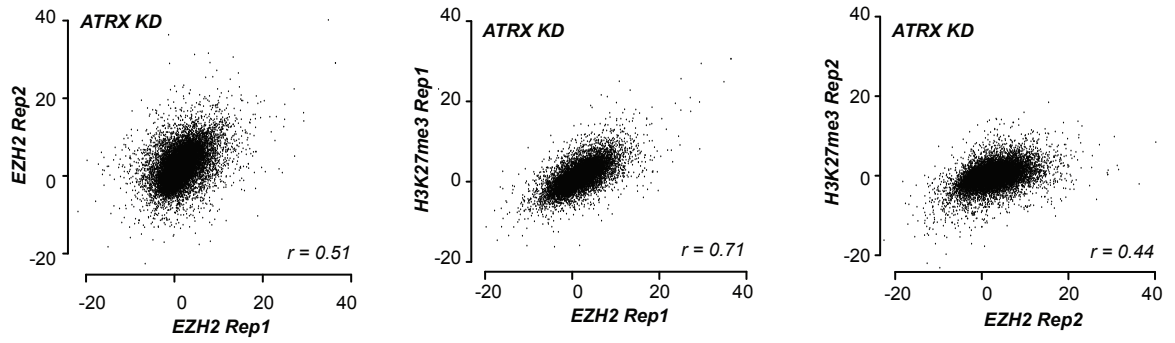**Figure S5**

Supplement: NIHMS635642-supplement-Figure_S5.pdf [file NIHMS635642-supplement-Figure_S5.pdf]

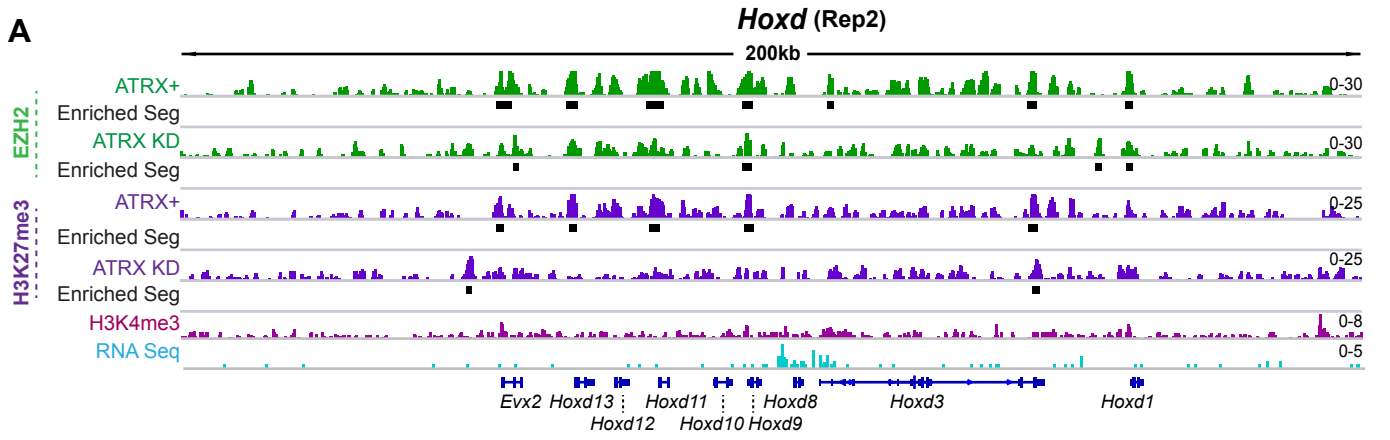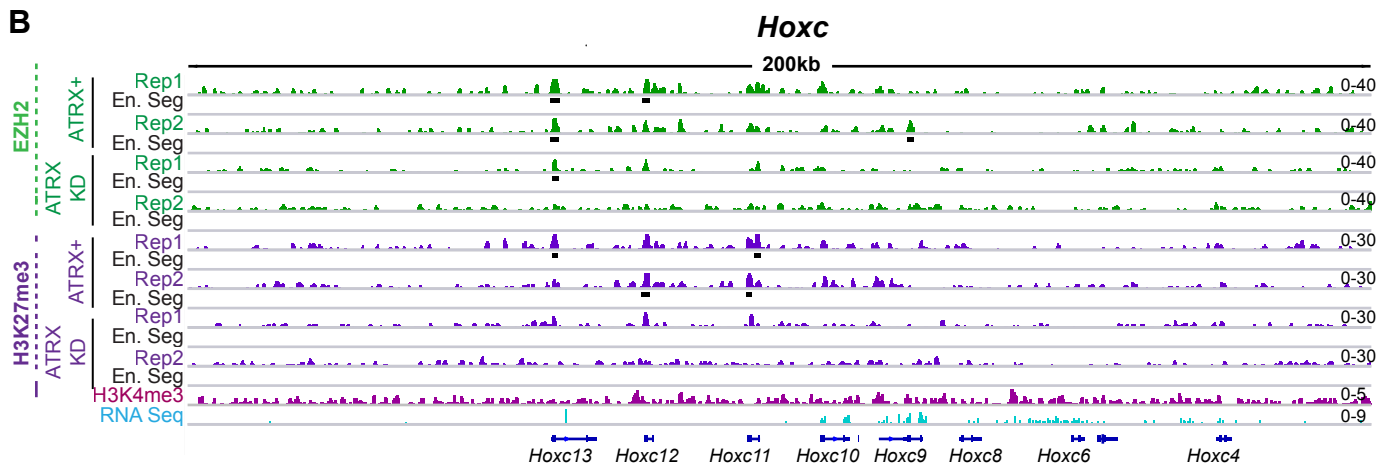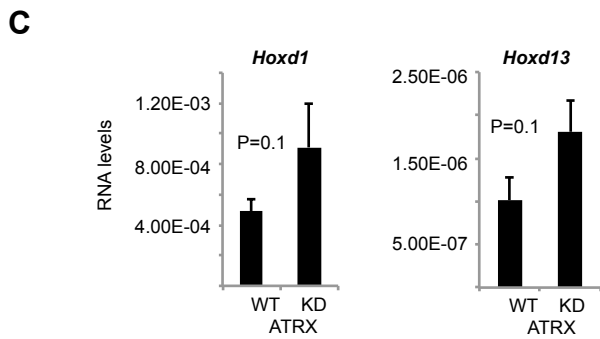

**D**

|                | EZH2 coverage (Rep2) |         | H3K27me3 coverage |         |
|----------------|----------------------|---------|-------------------|---------|
|                | ATRX+                | ATRX KD | ATRX+             | ATRX KD |
| <i>Parp12</i>  | 4.1897               | 2.7774  | 1.3524            | -3.9981 |
| <i>Rnf19b</i>  | 2.6821               | -1.5678 | 2.2072            | -3.9685 |
| <i>Spock2</i>  | 13.0416              | 2.6015  | 8.7011            | -0.4310 |
| <i>Zc3h11a</i> | -3.3822              | 0.3043  | -1.5601           | 0.1576  |

Figure S6

Supplement: NIHMS635642-supplement-Figure_S6.pdf [file NIHMS635642-supplement-Figure_S6.pdf]

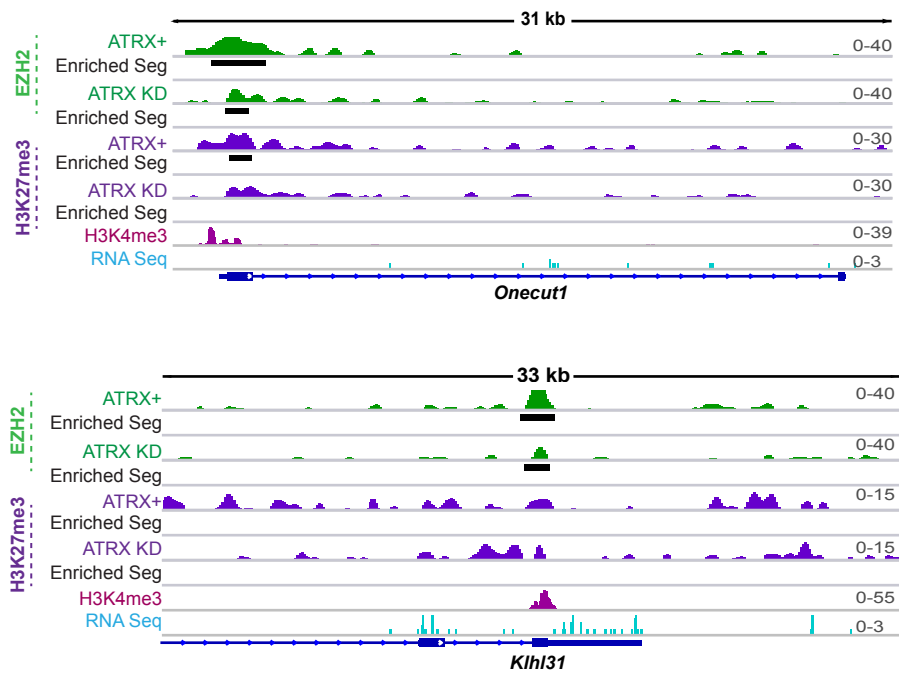

**Figure S7**

Supplement: NIHMS635642-supplement-Figure_S7.pdf [file NIHMS635642-supplement-Figure_S7.pdf]
